# Supplementary material for: Gene Expression Analyses Implicate an Alternative Splicing Program in Regulating Contractile Gene Expression and Serum Response Factor Activity in Mice
Source: PLOS journal article supplement (doi:10.1371/journal.pone.0056590), 2013-02-20

*Ank2* exon 21

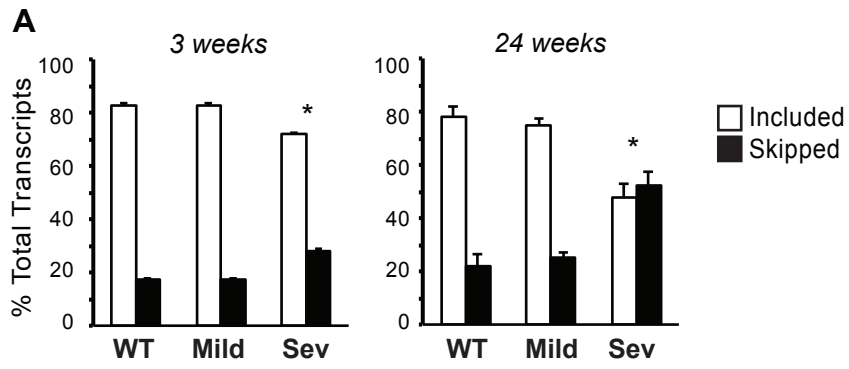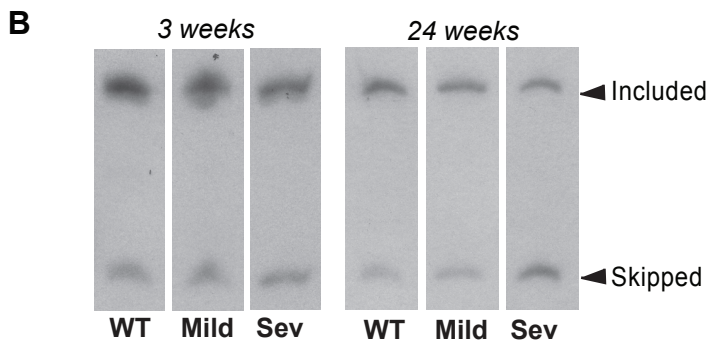

Supplement: S4 (10.1371/journal.pone.0056590.s004) [file journal.pone.0056590.s004]
