# Supplementary material for: Gene Expression Analyses Implicate an Alternative Splicing Program in Regulating Contractile Gene Expression and Serum Response Factor Activity in Mice
Source: PLoS One. 2013 Feb 20;8(2):e56590. doi: 10.1371/journal.pone.0056590 (PMC3577904; doi:10.1371/journal.pone.0056590)
Supplement: Table S3 — Significantly affected genes in MHC-CELFΔ hearts. (XLS) [file pone.0056590.s007.xls]

## Sheet: Affected genes
Table S3. Significantly affected genes in MHC-CELF∆ hearts
	MILD LINE						SEVERE LINE
ID	logFC	P.Value	adj.P.Val	FC relative to WT	regulated	Absolute Fold Change	logFC	P.Value	adj.P.Val	FC relative to WT	regulated	Absolute Fold Change
D130050A01RIK	5.15208	2.06295e-18	6.34853e-14	35.5574	up	35.5574	4.97945	3.43268e-18	1.05637e-13	31.5473	up	31.5473
DUSP26	2.48444	5.95331e-14	2.29009e-10	5.59618	up	5.59618	2.145	5.13709e-13	2.25841e-09	4.42293	up	4.42293
ITGB1BP3	1.99763	1.03735e-11	2.59433e-08	3.99343	up	3.99343	1.93266	1.66993e-11	5.71006e-08	3.81758	up	3.81758
TNNT1	1.90105	1.86385e-10	2.38992e-07	3.73484	up	3.73484	4.0976	2.598e-15	1.99877e-11	17.1199	up	17.1199
SCL000959.1_2	1.88616	1.68534e-09	1.44068e-06	3.69649	up	3.69649	1.01133	5.1769e-06	0.000769632	2.01577	up	2.01577
RCAN1	1.88543	1.05638e-08	5.58987e-06	3.69463	up	3.69463	2.14781	1.77778e-09	2.02627e-06	4.43154	up	4.43154
TNFRSF12A	1.52864	3.85007e-07	7.54663e-05	2.88514	up	2.88514	1.13258	1.37074e-05	0.00156814	2.1925	up	2.1925
ACTA1	1.4223	1.09593e-11	2.59433e-08	2.68013	up	2.68013	1.17459	1.6878e-10	3.05531e-07	2.25729	up	2.25729
GDF15	1.40811	6.38153e-08	2.02573e-05	2.65388	up	2.65388	1.04409	2.71353e-06	0.000477179	2.06207	up	2.06207
CTGF	1.35202	9.79434e-06	0.000927419	2.55269	up	2.55269	1.5424	2.10809e-06	0.000398002	2.91279	up	2.91279
DSCR1	1.30074	1.07169e-08	5.58987e-06	2.46356	up	2.46356	1.40856	3.62471e-09	3.63597e-06	2.65471	up	2.65471
2310002L09RIK	1.17329	5.77623e-11	9.35567e-08	2.25526	up	2.25526	2.60187	5.01012e-16	7.70907e-12	6.07073	up	6.07073
COL8A1	1.12442	4.59233e-09	2.77107e-06	2.18014	up	2.18014	1.35675	3.38815e-10	4.73941e-07	2.56107	up	2.56107
PPP1R1A	1.05358	3.99761e-09	2.54951e-06	2.07567	up	2.07567	1.92999	7.27727e-13	2.79938e-09	3.81052	up	3.81052
2900055J20RIK	0.318579	0.00065679	0.0235572	1.2471		1.2471	1.0099	7.81392e-10	1.00194e-06	2.01377	up	2.01377
CKB	0.410998	0.000303414	0.013282	1.32961		1.32961	1.01201	7.69937e-09	6.76972e-06	2.01672	up	2.01672
FHL1	0.455716	0.000483625	0.0188693	1.37146	slight up	1.37146	1.01791	5.64004e-08	3.0969e-05	2.02499	up	2.02499
TIMP1	0.183202	0.358189	0.815068	1.1354		1.1354	1.06419	6.00579e-05	0.00476346	2.091	up	2.091
4833412C05RIK	0.663155	1.69033e-07	4.26663e-05	1.58354	slight up	1.58354	1.07625	2.38143e-10	3.48981e-07	2.10855	up	2.10855
TPM2	0.532805	3.80592e-05	0.00264387	1.44674	slight up	1.44674	1.12388	3.66267e-09	3.63597e-06	2.17932	up	2.17932
ENO2	0.596573	9.0972e-07	0.000145056	1.51212	slight up	1.51212	1.14857	1.40918e-10	2.89107e-07	2.21694	up	2.21694
SCL0002124.1_39	-0.0129674	0.852922	0.97189	0.991052		1.00903	1.1983	2.24187e-11	6.89914e-08	2.29469	up	2.29469
SCX	0.68073	1.86827e-05	0.0015414	1.60295	slight up	1.60295	1.20631	1.59307e-08	1.16726e-05	2.30747	up	2.30747
SPON2	0.529807	0.0293647	0.307375	1.44374	slight up (n.s.)	1.44374	1.25031	4.32944e-05	0.00369778	2.37892	up	2.37892
LEPREL1	0.351131	1.31301e-05	0.00117461	1.27556		1.27556	1.26567	4.3863e-13	2.24974e-09	2.40439	up	2.40439
D1ERTD471E	0.19276	0.0275066	0.296443	1.14295		1.14295	1.31109	4.49691e-11	1.15323e-07	2.48128	up	2.48128
LOC381283	0.0964066	0.290763	0.77194	1.06911		1.06911	1.31226	2.08243e-10	3.37288e-07	2.48331	up	2.48331
SYPL2	0.103262	0.234113	0.726123	1.0742		1.0742	1.39439	3.997e-11	1.11822e-07	2.62878	up	2.62878
AW551984	0.300448	0.00609899	0.114655	1.23153		1.23153	1.41089	1.95387e-10	3.34046e-07	2.65901	up	2.65901
RAB15	0.414809	0.000650933	0.0234017	1.33312		1.33312	1.46548	1.67853e-10	3.05531e-07	2.76156	up	2.76156
SCL0001978.1_6	-0.0382075	0.410072	0.838112	0.973864		1.02684	1.4663	2.4359e-15	1.99877e-11	2.76312	up	2.76312
SCL0002069.1_48	0.0471717	0.472459	0.866889	1.03324		1.03324	2.01005	4.08443e-15	2.51388e-11	4.02796	up	4.02796
CEP70	2.95422	2.02253e-16	3.11206e-12	7.7501	up	7.7501	-0.0898127	0.260609	0.704929	0.939645		1.06423
PDLIM1	1.23397	1.02196e-10	1.42953e-07	2.35213	up	2.35213	0.755875	8.41725e-08	4.17237e-05	1.68866	slight up	1.68866
1500017E21RIK	1.16084	5.49746e-10	6.0421e-07	2.23588	up	2.23588	0.372087	0.000458016	0.0192555	1.29422		1.29422
2810405K02RIK	1.21364	6.14429e-10	6.30282e-07	2.31923	up	2.31923	0.437225	0.000166583	0.00970913	1.354	slight up	1.354
NQO1	1.03741	1.1828e-09	1.07057e-06	2.05254	up	2.05254	7.52889e-05	0.99925	0.99977	1.00005		1.00005
MYL1	1.41096	2.99028e-09	2.19929e-06	2.65913	up	2.65913	0.848603	2.18142e-06	0.000406854	1.80076	slight up	1.80076
SCGB1C1	1.56498	3.00157e-09	2.19929e-06	2.95874	up	2.95874	0.361721	0.0122743	0.17061	1.28496		1.28496
SEPX1	1.00373	4.06416e-09	2.54951e-06	2.00518	up	2.00518	0.688189	5.77935e-07	0.000157393	1.61126	slight up	1.61126
BDH1	1.03786	5.48808e-09	3.1276e-06	2.05318	up	2.05318	0.0889138	0.328917	0.759119	1.06357		1.06357
XIRP2	1.14786	1.00001e-08	5.49544e-06	2.21585	up	2.21585	0.549892	7.35014e-05	0.00551691	1.46398	slight up	1.46398
SYNPO2L	1.30023	1.32994e-08	6.49642e-06	2.46269	up	2.46269	0.749572	1.27046e-05	0.00147536	1.68129	slight up	1.68129
KBTBD5	1.05136	1.73873e-08	8.23196e-06	2.07248	up	2.07248	0.846252	2.9617e-07	0.000108504	1.79782	slight up	1.79782
SPSB4	1.38671	4.11606e-08	1.49021e-05	2.61482	up	2.61482	0.73684	7.51485e-05	0.00558604	1.66652	slight up	1.66652
EGR1	1.28401	3.49912e-06	0.000403303	2.43514	up	2.43514	0.485564	0.0167357	0.203809	1.40013	slight up (n.s.)	1.40013
CASQ1	1.09536	1.2519e-05	0.00113982	2.13666	up	2.13666	0.590219	0.00369935	0.0817844	1.50548	slight up (n.s.)	1.50548
NPPB	1.43768	1.61482e-05	0.00137564	2.70885	up	2.70885	0.880465	0.00169538	0.0485838	1.84097	slight up	1.84097
FOS	1.00513	0.000228948	0.0107897	2.00713	up	2.00713	0.26802	0.219169	0.667331	1.20415		1.20415
ABRA	1.19135	0.000749162	0.0257551	2.28366	up	2.28366	0.570139	0.0619691	0.405322	1.48467	slight up (n.s.)	1.48467
CES3	-1.82713	4.14231e-09	2.54951e-06	0.281825	down	3.5483	-1.05584	4.63358e-06	0.000712969	0.481018	down	2.07892
TMEM16K	-1.57795	2.6986e-07	5.80746e-05	0.334957	down	2.98546	-1.17295	9.63726e-06	0.00120072	0.443515	down	2.25472
6720475J19RIK	-0.528172	0.0218558	0.259888	0.693433	slight down (n.s.)	1.4421	-1.17229	4.37391e-05	0.00370806	0.443717	down	2.25369
ERDR1	0.624724	0.00089722	0.0295305	1.54192	slight up	1.54192	-1.05375	4.55946e-06	0.000705089	0.481715	down	2.07591
TMEM82	-0.759849	0.00151203	0.0432848	0.590558	slight down	1.69331	-1.04186	8.79199e-05	0.00612137	0.4857	down	2.05888
MYBPHL	-3.02333	1.87607e-14	9.62236e-11	0.122995	down	8.13044	-0.15051	0.178824	0.624329	0.900932		1.10996
HOPX	-2.99949	8.41567e-16	8.63279e-12	0.125044	down	7.9972	-0.512833	2.53904e-05	0.00249136	0.700845	slight down	1.42685
LRTM1	-2.23288	4.26448e-15	2.6247e-11	0.212734	down	4.70071	-0.768992	1.8082e-08	1.26467e-05	0.586827	slight down	1.70408
MYOM2	-2.11205	1.95129e-11	4.21171e-08	0.231318	down	4.32306	-0.091056	0.459759	0.837796	0.938835		1.06515
SCL000994.1_0	-2.02494	3.28081e-12	9.17851e-09	0.245715	down	4.06975	-0.582938	3.9443e-05	0.00343858	0.667603	slight down	1.4979
D330008I21RIK	-2.01175	5.15619e-11	8.81537e-08	0.247973	down	4.0327	-0.825514	6.50152e-06	0.000889235	0.564281	slight down	1.77217
SLC22A1	-1.8818	3.82244e-13	1.17632e-09	0.271346	down	3.68534	-0.563668	4.91914e-06	0.000742066	0.67658	slight down	1.47802
MYL7	-1.82222	3.47819e-09	2.43268e-06	0.282786	down	3.53624	-0.404549	0.0163247	0.201192	0.755473		1.32367
SLN	-1.81725	1.06519e-09	1.02438e-06	0.283762	down	3.52408	-0.325472	0.0312271	0.286666	0.798037		1.25307
HAMP	-1.75514	4.74955e-08	1.64228e-05	0.296245	down	3.37558	-0.63597	0.00244413	0.0623678	0.643508	slight down (n.s.)	1.55398
CRIP2	-1.67199	3.51534e-15	2.6247e-11	0.31382	down	3.18654	-0.361848	5.32023e-06	0.000770372	0.778167		1.28507
FHL2	-1.66404	3.566e-14	1.56771e-10	0.315554	down	3.16903	-0.697185	8.94052e-09	7.64265e-06	0.616774	slight down	1.62134
WHRN	-1.62035	2.45914e-11	4.72984e-08	0.325256	down	3.0745	-0.152382	0.124192	0.543934	0.899763		1.1114
CORIN	-1.45693	3.12146e-10	3.69461e-07	0.364268	down	2.74523	-0.622476	1.72583e-05	0.00185702	0.649555	slight down	1.53951
TTLL1	-1.45052	1.73308e-10	2.31886e-07	0.365891	down	2.73306	-0.666936	4.67483e-06	0.000715738	0.629843	slight down	1.5877
A2BP1	-1.4125	2.05289e-11	4.21171e-08	0.375661	down	2.66197	-0.418631	0.000107807	0.00710415	0.748134		1.33666
IFT81	-1.39141	2.99529e-13	1.02419e-09	0.381192	down	2.62335	-0.954368	7.00608e-11	1.6585e-07	0.516068	slight down	1.93773
LAMB3	-1.38335	7.61998e-11	1.11665e-07	0.383327	down	2.60874	-0.61366	3.61074e-06	0.000575736	0.653537	slight down	1.53014
MOV10L1	-1.3752	1.2697e-08	6.30223e-06	0.385499	down	2.59404	-0.342979	0.0145342	0.188406	0.788412		1.26837
FBP2	-1.33668	5.82989e-08	1.90861e-05	0.395931	down	2.52569	-0.847699	1.51339e-05	0.00166929	0.55567	slight down	1.79963
9930105H17RIK	-1.26835	2.63163e-09	2.07656e-06	0.415133	down	2.40887	-0.874917	3.60082e-07	0.000113103	0.545285		1.8339
SNAI3	-1.24427	3.24652e-06	0.000383997	0.422122	down	2.36898	-0.545596	0.00672799	0.118924	0.685109	slight down (n.s.)	1.45962
KCNV2	-1.21422	2.26267e-07	5.23544e-05	0.431007	down	2.32015	-0.780828	4.0462e-05	0.00348789	0.582033	slight down	1.71812
PPIL1	-1.12268	2.51767e-08	1.06135e-05	0.459241	down	2.1775	-0.499228	0.000296089	0.0142333	0.707485	slight down	1.41346
5330432B20RIK	-1.09759	3.19631e-09	2.28752e-06	0.467298	down	2.13996	-0.183169	0.0588047	0.394863	0.880766		1.13538
PLN	-1.08287	5.84174e-07	0.000103915	0.472089	down	2.11825	-0.671079	0.000127131	0.00795189	0.628037	slight down	1.59226
RYR2	-1.07251	2.51416e-09	2.03607e-06	0.475492	down	2.10309	-0.478511	5.3981e-05	0.00438886	0.717718	slight down	1.39331
9130213B05RIK	-1.0446	4.71424e-06	0.000514454	0.484779	down	2.06279	0.144392	0.352748	0.773622	1.10526		0.904761
AGTR1A	-1.04456	5.2601e-09	3.11297e-06	0.484793	down	2.06273	-0.249807	0.0127672	0.174011	0.841009		1.18905
DKK3	-1.03705	1.91031e-08	8.64529e-06	0.487324	down	2.05202	-0.107284	0.28399	0.725573	0.928334		1.0772
6720477C19RIK	-1.03106	5.4852e-08	1.8348e-05	0.489352	down	2.04352	-0.422256	0.00101831	0.0342862	0.746257		1.34002
KCND2	-1.0211	1.03153e-07	2.99474e-05	0.492739	down	2.02947	-0.499082	0.000332534	0.0155052	0.707557	slight down	1.41331
ABHD1	-1.00591	3.64855e-07	7.2439e-05	0.497955	down	2.00821	-0.409994	0.00328152	0.0759861	0.752626		1.32868
