# Supplementary material for: Gene Expression Analyses Implicate an Alternative Splicing Program in Regulating Contractile Gene Expression and Serum Response Factor Activity in Mice
Source: PLoS One. 2013 Feb 20;8(2):e56590. doi: 10.1371/journal.pone.0056590 (PMC3577904; doi:10.1371/journal.pone.0056590)
Supplement: Table S4 — Comparison of genes affected in MHC-CELFΔ hearts with microarray data sets from cardiac-specific SRSF1 and SRSF2 knockout models. (XLS) [file pone.0056590.s008.xls]

## Sheet: Comparison to SR protein KOs
Table S4. Comparison of genes affected in MHC-CELF∆ hearts with microarray data sets from cardiac-specific SRSF1 and SRSF2 knockout models
ID	effects in MHC-CELF∆ mice	effects in SRSF1 knockout	effects in SRSF2 knockout
D130050A01RIK	up-regulated in both lines	no difference reported	no difference reported
DUSP26	up-regulated in both lines	no difference reported	no difference reported
ITGB1BP3	up-regulated in both lines	no difference reported	no difference reported
TNNT1	up-regulated in both lines	up-regulated 2.6X	no difference reported
SCL000959.1_2	up-regulated in both lines	no difference reported	no difference reported
RCAN1	up-regulated in both lines	no difference reported	no difference reported
TNFRSF12A	up-regulated in both lines	no difference reported	no difference reported
ACTA1	up-regulated in both lines	up-regulated 2.44X	up-regulated 3.79X
GDF15	up-regulated in both lines	up-regulated 2.45X	no difference reported
CTGF	up-regulated in both lines	up-regulated 4.13X	up-regulated 4.71X
DSCR1	up-regulated in both lines	no difference reported	no difference reported
2310002L09RIK	up-regulated in both lines	no difference reported	no difference reported
COL8A1	up-regulated in both lines	up-regulated 2.95X	up-regulated 3.89X
PPP1R1A	up-regulated in both lines	no difference reported	no difference reported
2900055J20RIK	up-regulated in severe line only	no difference reported	no difference reported
CKB	up-regulated in severe line only	no difference reported	no difference reported
FHL1	up-regulated in severe line only	up-regulated 2.87X	up-regulated 2.11X
TIMP1	up-regulated in severe line only	up-regulated 2.04X	up-regulated 2.03X
4833412C05RIK	up-regulated in severe line only	no difference reported	no difference reported
TPM2	up-regulated in severe line only	no difference reported	no difference reported
ENO2	up-regulated in severe line only	no difference reported	no difference reported
SCL0002124.1_39	up-regulated in severe line only	no difference reported	no difference reported
SCX	up-regulated in severe line only	no difference reported	no difference reported
SPON2	up-regulated in severe line only	no difference reported	no difference reported
LEPREL1	up-regulated in severe line only	no difference reported	no difference reported
D1ERTD471E	up-regulated in severe line only	no difference reported	no difference reported
LOC381283	up-regulated in severe line only	no difference reported	no difference reported
SYPL2	up-regulated in severe line only	no difference reported	no difference reported
AW551984	up-regulated in severe line only	no difference reported	no difference reported
RAB15	up-regulated in severe line only	no difference reported	no difference reported
SCL0001978.1_6	up-regulated in severe line only	no difference reported	no difference reported
SCL0002069.1_48	up-regulated in severe line only	no difference reported	no difference reported
CEP70	up-regulated in mild line only	no difference reported	no difference reported
PDLIM1	up-regulated in mild line only	no difference reported	no difference reported
1500017E21RIK	up-regulated in mild line only	no difference reported	no difference reported
2810405K02RIK	up-regulated in mild line only	no difference reported	no difference reported
NQO1	up-regulated in mild line only	no difference reported	no difference reported
MYL1	up-regulated in mild line only	no difference reported	no difference reported
SCGB1C1	up-regulated in mild line only	no difference reported	no difference reported
SEPX1	up-regulated in mild line only	no difference reported	no difference reported
BDH1	up-regulated in mild line only	no difference reported	no difference reported
XIRP2	up-regulated in mild line only	no difference reported	no difference reported
SYNPO2L	up-regulated in mild line only	no difference reported	no difference reported
KBTBD5	up-regulated in mild line only	no difference reported	no difference reported
SPSB4	up-regulated in mild line only	no difference reported	no difference reported
EGR1	up-regulated in mild line only	no difference reported	no difference reported
CASQ1	up-regulated in mild line only	no difference reported	no difference reported
NPPB	up-regulated in mild line only	up-regulated 3.6X	up-regulated 3.47X
FOS	up-regulated in mild line only	no difference reported	no difference reported
ABRA	up-regulated in mild line only	no difference reported	no difference reported
CES3	down-regulated in both lines	down-regulated -2.03X	down-regulated -2.22X
TMEM16K	down-regulated in both lines	no difference reported	no difference reported
6720475J19RIK	down-regulated in severe line only	no difference reported	no difference reported
ERDR1	down-regulated in severe line only	no difference reported	no difference reported
TMEM82	down-regulated in severe line only	no difference reported	no difference reported
MYBPHL	down-regulated in mild line only	no difference reported	no difference reported
HOPX	down-regulated in mild line only	no difference reported	no difference reported
LRTM1	down-regulated in mild line only	no difference reported	no difference reported
MYOM2	down-regulated in mild line only	no difference reported	no difference reported
SCL000994.1_0	down-regulated in mild line only	no difference reported	no difference reported
D330008I21RIK	down-regulated in mild line only	no difference reported	no difference reported
SLC22A1	down-regulated in mild line only	no difference reported	no difference reported
MYL7	down-regulated in mild line only	no difference reported	no difference reported
SLN	down-regulated in mild line only	no difference reported	no difference reported
HAMP	down-regulated in mild line only	no difference reported	no difference reported
CRIP2	down-regulated in mild line only	no difference reported	no difference reported
FHL2	down-regulated in mild line only	no difference reported	no difference reported
WHRN	down-regulated in mild line only	no difference reported	no difference reported
CORIN	down-regulated in mild line only	no difference reported	no difference reported
TTLL1	down-regulated in mild line only	no difference reported	no difference reported
A2BP1	down-regulated in mild line only	no difference reported	no difference reported
IFT81	down-regulated in mild line only	no difference reported	no difference reported
LAMB3	down-regulated in mild line only	no difference reported	no difference reported
MOV10L1	down-regulated in mild line only	no difference reported	no difference reported
FBP2	down-regulated in mild line only	no difference reported	no difference reported
9930105H17RIK	down-regulated in mild line only	no difference reported	no difference reported
SNAI3	down-regulated in mild line only	no difference reported	no difference reported
KCNV2	down-regulated in mild line only	no difference reported	no difference reported
PPIL1	down-regulated in mild line only	no difference reported	no difference reported
5330432B20RIK	down-regulated in mild line only	no difference reported	no difference reported
PLN	down-regulated in mild line only	no difference reported	no difference reported
RYR2	down-regulated in mild line only	no difference reported	down-regulated -2.11X
9130213B05RIK	down-regulated in mild line only	no difference reported	no difference reported
AGTR1A	down-regulated in mild line only	no difference reported	no difference reported
DKK3	down-regulated in mild line only	no difference reported	no difference reported
6720477C19RIK	down-regulated in mild line only	no difference reported	no difference reported
KCND2	down-regulated in mild line only	no difference reported	no difference reported
ABHD1	down-regulated in mild line only	no difference reported	no difference reported
